# Supplementary material for: Abnormal hypothalamic functional connectivity and serum arousal-promoting neurotransmitters in insomnia disorder patients: a pilot study
Source: PeerJ journal article supplement (doi:10.7717/peerj.18540), 2024-11-21
Supplement: Raw_data.xlsx [file Raw_data.xlsx]

## Sheet: Sheet1
	Group	gender	age	BMI	PSQI	ISI	HAMA	HAMD	MOCA	TST	SE	WASO_time	WASO_number	SOL	REM_L	Wake duration	R duration	R_perc	N1 duration	N1_perc	N2 duration	N2_perc	N3 duration	N3_perc	ArI_REM	ArI_NREM	ArI	FC of PH with Precuneus_L	FC of PH with Angular_L	FC of PH with Angular_R	FC of PH with Frontal_Sup_Medial_R	FC of PH with Frontal_Sup_Orb_L	FC of PH with Frontal_Sup_Orb_R	FC of PH with Cingulum_Ant_R	FC of AH with Cingulum_Ant_R	HIS	OX-A
ID1	insomnia	male	22.2822	17.7254	7	15	7	4	27	288.5	0.601	134.5	16	57	79	191.5	50.5	17.5	42.5	14.7	146.5	50.8	49	17	0	0	9.1	-0.0343805	-0.0169739	-0.135077	-0.187602	0.063325	-0.260884	-0.120111	-0.199171	18.5392	62.4405
ID2	insomnia	male	27.611	22.613	10	19	8	13	27	202	0.422	260	11	16.5	346.5	276.5	37	18.3	22.5	11.1	94	46.5	48.5	24	0.9	3.2	13.8	-0.402506	-0.49084	-0.384999	-0.225741	-0.0394159	-0.0711751	0.0135667	-0.146697	19.2519	63.0275
ID3	insomnia	male	53.9342	23.6713	10	18	7	9	24	363.5	0.77	101	46	7.5	47.5	108.5	98	27	63.5	17.5	167.5	46.1	34.5	9.5	2.5	3.1	10.6	0.052844	-0.0819273	-0.0434628	-0.00128728	-0.158421	0.0409988	-0.0219394	-0.0438697	17.9561	62.0643
ID4	insomnia	male	22.9479	20.2449	12	16	2	3	29	337	0.8	65	13	19	151.5	84	69.5	20.6	32.5	9.6	189	56.1	46	13.6	0.7	1.7	2.9	-0.0565795	-0.0559427	-0.112098	-0.0751454	0.0055732	-0.0352226	0.0326938	-0.27084	19.2433	55.5321
ID5	insomnia	male	24.7205	25.0593	7	5	1	0	26	410	0.876	26	24	32	98.5	58	109	26.6	101.5	24.8	123	30	76.5	18.7	0.5	0.6	7.2	0.0568457	0.0642441	0.0441545	-0.0956409	-0.0967043	-0.0847976	-0.218915	-0.0262161	16.9421	11.3089
ID6	insomnia	female	53	22.9553	14	20	0	0	24	443	0.925	22.5	23	13.5	79.5	36	86	19.4	25.5	5.8	218.5	49.3	113	25.5	2.4	4.2	13.1	0.0291146	0.00145091	0.0482192	0.0335654	-0.0192467	-0.0461809	-0.0526656	0.0602643	19.8406	12.7921
ID7	insomnia	female	45	21.3333	13	15	4	5	27	430	0.894	19.5	27	31.5	79	51	114	26.5	21.5	5	217	50.5	77.5	18	0	4.2	4.9	0.0950151	-0.0545839	0.0699398	-0.0603234	0.0185614	-0.0480037	0.0780729	0.00254846	21.0531	11.874
ID8	insomnia	male	45	19.7055	10	16	0	5	27	405	0.841	54.5	31	22	64.5	76.5	98	24.2	46.5	11.5	197	48.6	63.5	15.7	5.5	11	19.5	-0.306335	-0.280311	-0.163655	-0.0140052	-0.223573	0.00207564	-0.258185	0.197577	21.1208	11.5481
ID9	insomnia	male	30	18.6197	15	13	6	7	28	438	0.894	36.5	25	15.5	97	52	109	24.9	29	6.6	216.5	49.4	83.5	19.1	0	6.1	8.6	0.0780456	0.0923479	0.000184641	0.0481726	0.0775187	0.041368	-0.0875209	-0.0115444	22.0809	12.2508
ID10	insomnia	female	23	17.1875	9	17	3	2	30	459.5	0.941	14.5	25	14.5	47	29	91.5	19.9	15	3.3	186	40.5	167	36.3	0.5	5.9	9.1	0.054699	0.105247	0.115373	0.0477994	-0.021223	0.138291	0.164588	0.177726	21.8871	11.6169
ID11	insomnia	female	53	20.3125	8	18	6	5	22	276.5	0.564	197	36	16.5	194	213.5	55.5	20.1	6	2.2	107	38.7	108	39.1	3.7	8.6	13.8	0.0630155	0.108046	0.0218216	0.0018623	0.0615989	0.0384367	0.11848	-0.0769289	22.144	12.8609
ID12	insomnia	female	24	18.9036	8	12	6	8	28	386.5	0.799	36	39	61.5	132.5	97.5	101	26.1	25	6.5	166	42.9	94.5	24.5	0.5	10.1	11.3	0.0610421	-0.0420675	-0.0147857	0.0207519	-0.00393338	0.00254968	0.0221254	-0.0984014	20.7556	12.4901
ID13	insomnia	female	47	27.4756	10	15	5	4	27	313	0.651	93.5	35	74	199	167.5	45.5	14.5	110	35.1	136	43.5	21.5	6.9	0.6	0	15.5	0.169479	0.144997	0.111404	0.127221	0.12106	0.0970316	0.267575	0.173055	20.9495	11.5541
ID14	insomnia	female	40	19.2819	15	26	3	4	28	358.5	0.742	108.5	24	16	80	124.5	76.5	21.3	38.5	10.7	155	43.2	88.5	24.7	1.2	4.7	12.6	0.0918866	0.208269	0.180155	0.100088	0.0549091	0.039463	0.0942637	-0.099494	19.1509	10.9979
ID15	insomnia	female	37	20.5049	12	20	1	5	27	305.5	0.621	116.5	26	70	168	186.5	92	30.1	30	9.8	76.5	25	107	35	1	6.5	9.3	0.0123907	-0.0872257	-0.0484592	0.125043	-0.100059	-0.0153592	0.193373	0.0163946	17.6365	59.927
ID16	insomnia	female	39	24.5289	15	10	6	6	25	262.5	0.545	190.5	32	29	119.5	219.5	37.5	14.3	31	11.8	110.5	42.1	83.5	31.8	0.2	6.4	7.7	-0.0935387	-0.00271277	0.0115186	0.0578462	0.00814158	0.101241	0.00786313	-0.0424966	22.144	13.0373
ID17	insomnia	female	32	20.1274	9	8	1	4	28	415.5	0.837	52	25	29	115	81	67.5	16.2	72	17.3	228.5	55	47.5	11.4	4	0	9.7	-0.0146246	-0.105167	-0.0289119	0.0593963	0.102482	0.128494	0.190288	-0.0117423	20.6159	11.0278
ID18	insomnia	female	60	24.806	15	18	3	5	26	433.5	0.888	38.5	29	16	32	54.5	138	31.8	76.5	17.6	184	42.4	35	8.1	5.7	0.4	5.7	0.127255	-0.0804981	-0.184743	-0.0667246	0.0530848	-0.15751	0.151323	-0.0731672	17.7444	58.8133
ID19	insomnia	female	26	22.0317	10	13	2	3	29	429	0.905	32.5	26	12.5	74.5	45	105	24.5	41	9.6	210	49	73	17	1.1	8	8.1	0.084403	0.0968094	0.0948866	0.0853927	0.0250956	0.132817	0.156176	0.124459	20.3049	11.4404
ID20	insomnia	male	26	19.9573	10	8	2	1	27	405.5	0.905	31	23	11.5	194	42.5	77	19	90.5	22.3	205.5	50.7	32.5	8	1.3	2.3	9.3	0.0325572	0.0362451	3.75665e-05	0.0699082	0.137022	0.128084	0.0571244	-0.180399	21.7834	11.0218
ID21	insomnia	female	30	19.2672	11	15	5	6	26	417.5	0.619	257	43	0.5	124.5	257.5	53	12.7	27.5	6.6	279	66.8	58	13.9	4	0	0	0.104651	0.142202	0.169372	0.263901	0.153261	0.303371	0.129091	0.0214811	19.3402	12.7532
ID22	insomnia	male	36	22.5309	12	17	7	8	29	429.5	0.718	68.5	49	100	64	168.5	50	11.6	79	18.4	239.5	55.8	61	14.2	3.9	10.8	13.4	-0.142521	0.0111372	-0.035004	0.0413171	-0.0341759	-0.0588778	0.0829422	0.0541025	19.5115	11.871
ID23	insomnia	female	32	19.0618	11	14	3	3	27	238	0.495	210.5	20	32	351	242.5	42.5	17.9	44	18.5	114.5	48.1	37	15.5	0	1.4	7.4	0.0137478	-0.0143426	0.132616	-0.0524186	-0.151915	-0.0742184	-0.139806	-0.0223039	18.9193	58.6326
ID24	insomnia	female	33	20.0288	14	12	6	5	29	343.5	0.754	107.5	34	4.5	64	112	75	21.8	36.5	10.6	170.5	49.6	61.5	17.9	1.2	4.8	13.4	-0.112592	-0.153322	-0.0723847	0.0144812	-0.134787	-0.115108	0.0376539	-0.192277	19.5926	12.2957
ID25	insomnia	female	46	18.75	17	20	4	6	27	380	0.887	43.5	37	5	81.5	48.5	104.5	27.5	30.5	8	162	42.6	83	21.8	2.4	12.6	10.9	-0.168685	-0.069443	-0.0975761	0.0232827	-0.183118	-0.0641624	-0.0310866	-0.250249	19.1734	11.0128
ID26	insomnia	male	21.7096	17.5853	8	13	8	5	24	427.5	0.743	146.5	25	1	94.5	147.5	97	22.7	53.5	12.5	236.5	55.3	40.5	9.5	1.2	1.5	1.4	-0.0111394	0.0228411	0.113432	-0.0130187	-0.0269863	0.121169	0.0276032	-0.234475	N	N
ID27	insomnia	male	27.1452	19.1001	9	15	8	10	28	383.5	0.717	135.5	35	15.5	201	151	68	17.7	64.5	16.8	147	38.3	104	27.1	0	9.3	7.7	-0.153899	-0.269484	-0.173126	-0.185446	-0.133149	-0.209412	-0.042765	-0.388212	N	N
ID28	insomnia	male	30.7836	17.2617	11	11	5	8	28	343	0.718	110.5	19	24.5	159	135	52	15.2	57	16.6	144.5	42.1	89.5	26.1	1.2	10.7	9.3	-0.0288843	-0.106348	0.0236754	-0.0671741	-0.0594239	0.0569623	0.0283786	0.0467516	N	N
ID29	insomnia	male	24.2904	21.5645	7	10	6	7	28	377	0.832	53.5	24	22.5	129.5	76	56.5	15	61	16.2	209.5	55.6	50	13.3	1.1	14.6	12.6	-0.0263705	0.0548993	0.0786418	0.0498027	0.115332	0.0899	0.274636	0.0048526	N	N
ID30	insomnia	female	28.2959	26.3806	11	10	4	6	26	373	0.777	70.5	29	36.5	152.5	107	86	23.1	63.5	17	141.5	37.9	82	22	14	32.4	28.2	-0.301388	-0.214096	-0.191256	-0.116186	-0.196886	-0.201824	-0.147983	-0.139087	N	N
HC1	control	female	23.8329	20.4152	4	1	1	0	28	353	0.836	17	24	52.5	154.5	69.5	45	12.7	18	5.1	204	57.8	86	24.4	0	9.3	8	0.238967	0.229578	0.208717	0.112203	0.0655613	0.158979	0.0395434	0.115718	15.9639	11.569
HC2	control	male	22.6329	21.3839	3	3	3	1	27	451	0.934	28	22	4	97	32	125.5	27.8	34	7.5	221	49	70.5	15.6	0.7	3.8	6.5	0.250332	0.301988	0.116927	0.0867264	0.234972	0.0402616	0.30214	0.125119	18.078	11.7484
HC3	control	male	40.9151	23.246	3	8	0	0	28	424.5	0.767	116	34	13	87	129	111.5	26.3	68.5	16.1	189.5	44.6	55	13	0.6	1.1	14.2	0.332857	0.24425	0.334851	0.321159	0.0852877	0.156867	0.25886	0.0129506	17.0548	10.0768
HC4	control	female	30.1452	24.974	7	6	3	1	28	316.5	0.699	78.5	23	57.5	75.5	136	59.5	18.8	53	16.7	188	59.4	16	5.1	0.4	1	13.8	0.125628	0.108285	0.255487	0.147744	0.222096	0.146672	0.0864198	0.0917249	15.5807	11.9368
HC5	control	female	24.9452	17.6898	3	0	0	0	29	411	0.954	12.5	13	7.5	85	20	136.5	33.2	35	8.5	179	43.6	60.5	14.7	0.3	0	3.5	0.015635	-0.0743617	0.11693	0.00226045	-0.101678	0.225704	0.0426065	0.107395	16.7302	10.8543
HC6	control	female	24.9726	21.2585	7	7	0	1	29	355	0.815	72	40	8.5	102	80.5	58	16.3	65.5	18.5	155	43.7	76.5	21.5	0	0	20.4	-0.0923001	-0.125115	-0.200576	0.00220756	0.0684541	0.0581383	0.169578	0.0512609	16.2073	10.5254
HC7	control	male	27.7041	20.5986	4	1	2	1	30	384.5	0.911	31	36	6.5	81.5	37.5	85.5	22.2	34.5	9	176.5	45.9	88	22.9	1.7	10.5	10.8	0.151077	0.0072371	0.167644	-0.06756	-0.0253266	0.110587	-0.079149	-0.0601416	15.6979	11.8023
HC8	control	female	23	21.875	4	4	0	0	28	466.5	0.815	80.5	19	25.5	120	106	112	24	25.5	5.5	174	37.3	155	33.2	0.3	6.4	4.9	0.115052	0.185897	0.232743	0.153675	0.210799	0.228631	0.20108	-0.036828	17.6768	10.008
HC9	control	female	25	19.5312	5	4	0	0	28	453.5	0.843	74	57	10.5	206	84.5	74.5	16.4	37	8.2	258	56.9	84	18.5	0	9.7	15.7	0.0918393	0.25743	0.206201	0.196856	0.275478	0.0318992	0.332636	0.108215	16.6581	10.6599
HC10	control	female	23	21.3226	2	2	0	0	30	393	0.774	21.5	16	93.5	63	115	63	16	33.5	8.5	205.5	52.3	91	23.2	1.2	2.9	2.5	0.246269	0.147199	0.375456	0.248309	0.107108	0.104506	0.215416	0.0498795	15.7385	10.1546
HC11	control	female	34	19.0443	2	0	3	0	28	504.5	0.923	38	20	4	77	42	140	27.8	46	9.1	214	42.4	104.5	20.7	0.8	1.3	4.6	0.0964067	0.18925	0.102653	0.118572	0.063255	0.110581	0.151726	0.323452	17.6453	10.1486
HC12	control	male	30	24.5351	5	5	0	1	26	208.5	0.422	191.5	11	94.5	266	286	16.5	7.9	46	22.1	100	48	46	22.1	0	3.6	5	0.0167327	0.279345	0.0591788	0.0245588	0.109686	0.16481	0.270927	0.0334491	17.2396	11.8023
HC13	control	male	34	25.5593	4	0	0	0	28	465	0.928	31.5	6	4.5	72	36	155.5	33.4	35.5	7.6	254.5	54.7	19.5	4.2	4.1	0	2.9	0.16757	0.2275	0.148974	0.157549	0.141446	0.0552846	0.288298	0.07917	15.7385	11.4075
HC14	control	female	23	19.4674	4	5	1	0	27	443.5	0.859	62.5	14	10	97.5	72.5	109	24.6	32.5	7.3	193.5	43.6	108.5	24.5	0	0	4.3	-0.109047	-0.0872165	-0.143067	0.10647	0.00336204	-0.161888	0.395181	-0.057128	18.0825	11.5989
HC15	control	female	35	22.0386	7	9	0	0	28	544.5	0.926	18	20	25.5	56	43.5	168	30.9	88.5	16.3	210.5	38.7	77.5	14.2	0.7	0.7	12.3	-0.0194415	0.0426719	-0.035863	0.0450336	0.113105	0.133547	0.141725	-0.153693	18.5423	10.5882
HC16	control	male	27	23.3234	0	1	1	4	27	503.5	0.917	17	14	28.5	78	45.5	105	20.9	38.5	7.6	230	45.7	130	25.8	1.3	1.1	5.4	0.00244076	0.10435	0.0966339	0.024208	0.120239	0.217675	0.0174408	0.0508393	16.5499	11.6498
HC17	control	male	23	21.847	5	2	0	0	29	448	0.865	47.5	42	22.5	76.5	70	111	24.8	89	19.9	175.5	39.2	72.5	16.2	0.3	1.1	11.9	0.268216	0.236902	0.176515	0.352272	0.268849	0.0344629	0.250957	0.075384	15.8377	10.4686
HC18	control	female	23	23.5294	3	0	1	2	30	363	0.709	108	30	41	284.5	149	49.5	13.6	52.5	14.5	144.5	39.8	116.5	32.1	2.1	19.4	10.9	-0.159825	0.0332988	-0.0759987	0.0682141	0.0775916	0.0995763	0.165683	0.075476	16.4056	10.8932
HC19	control	female	28	25.9516	6	6	4	3	26	401	0.955	14	13	5	144	19	69.5	17.3	46.5	11.6	200.5	50	84.5	21.1	0.1	0	6.3	0.216826	-0.0517068	0.0784144	0.0167945	0.0360916	0.113644	0.140188	-0.181853	15.8827	11.898
HC20	control	male	19	25.3444	4	3	1	4	30	483	0.935	21.5	21	12	96.5	33.5	99	20.5	46.5	9.6	257	53.2	80.5	16.7	2.4	1.8	3.1	-0.0697469	-0.000207006	-0.0274819	0.0584078	-0.0381598	0.0488697	-0.00412225	0.115528	18.0825	10.7317
HC21	control	female	30	19.4734	3	1	1	0	26	511	0.955	20.5	24	3.5	88	24	126.5	24.8	34.5	6.8	243.5	47.7	106.5	20.8	0.4	8.1	7.3	0.378784	0.297875	0.244549	0.225007	0.314229	0.185936	0.391238	0.213232	15.7475	11.6647
HC22	control	female	29	19.6052	5	7	3	4	26	488.5	0.899	30	28	25	93	55	98	20.1	15	3.1	157	32.1	218.5	44.7	0.1	3.7	6.3	0.122116	-0.0239141	0.0837224	0.161387	0.0663727	0.258172	0.334616	0.218879	17.0683	10.3759
HC23	control	male	29	25.7959	6	8	1	1	28	385	0.729	116.5	41	26.5	226.5	143	67.5	17.5	35	9.1	177	46	105.5	27.4	8.6	7.1	14	0.153811	0.120465	0.191762	0.22381	0.162209	0.0988559	0.196812	0.0738656	16.338	11.0696
HC24	control	female	54	21.7738	4	1	0	0	30	411	0.889	49	19	2.5	98.5	51.5	156	38	75.5	18.4	112	27.3	67.5	16.4	1	5	6.8	0.201128	0.248653	0.180673	0.189111	0.18276	0.145059	0.235744	0.246169	16.4868	10.7796
HC25	control	male	29	23.9512	4	0	0	0	27	406	0.651	208.5	43	9	231	217.5	64.5	15.9	72	17.7	202.5	49.9	67	16.5	1	4.7	13.9	0.188119	0.225342	0.209329	0.247986	0.0826687	0.225815	0.354864	0.152805	17.7174	11.276
HC26	control	female	34	18.4265	4	1	4	9	27	349	0.852	52	32	8.5	66	60.5	74	21.2	54	15.5	158	45.3	63	18.1	0	7.3	22.3	-0.025521	0.00148073	0.0171781	0.0298756	0.0349981	0.0028157	0.00500938	0.282561	15.8557	10.1157
HC27	control	male	26.8603	20.061	11	0	1	0	30	380.5	0.814	73.5	14	13.5	133.5	87	98.5	25.9	32	8.4	142.5	37.5	107.5	28.3	8.5	6.2	6.8	0.372666	0.26787	0.332261	0.190638	0.172109	0.496385	0.41139	0.470073	N	N
HC28	control	male	24.8164	18.8906	5	8	4	3	29	358	0.836	64	22	6	64.5	70	82.5	23	39	10.9	143	39.9	93.5	26.1	0.7	6.1	4.9	0.197737	-0.0182793	0.00722811	0.0996143	0.136205	0.111453	0.159562	0.0194111	N	N
HC29	control	male	29.9671	21.7993	3	1	2	3	28	424	0.93	24	22	8	106	32	111.5	26.3	32.5	7.7	235.5	55.5	44.5	10.5	0.5	3.8	3	0.197788	0.201362	0.309221	0.372845	0.142908	0.140701	0.225439	0.19038	N	N
HC30	control	male	27.6904	19.6283	3	2	1	1	30	329.5	0.963	11.5	16	1	75.5	12.5	64	19.4	23.5	7.1	193.5	58.7	48.5	14.7	1.9	6.1	5.3	0.186597	0.189296	0.123214	0.0291726	0.0976883	-0.0784448	-0.00745661	0.0303197	N	N
